# Supplementary material
Source: PubMed Central journal article supplement (PMC7739562)

**A**

| Stage | Periods (day) | Markers/ Characteristics                |                                                                   |
|-------|---------------|-----------------------------------------|-------------------------------------------------------------------|
| Early | I             | 1-4                                     | Increased cell proliferations                                     |
|       | II            | 5-7                                     | Transcription and protein expression of Alkaline Phosphatase (AP) |
| Mid   | 5-14          | Expression of a collagen type I matrix  |                                                                   |
| Final | 14-28         | Mineralization by calcium and phosphate |                                                                   |

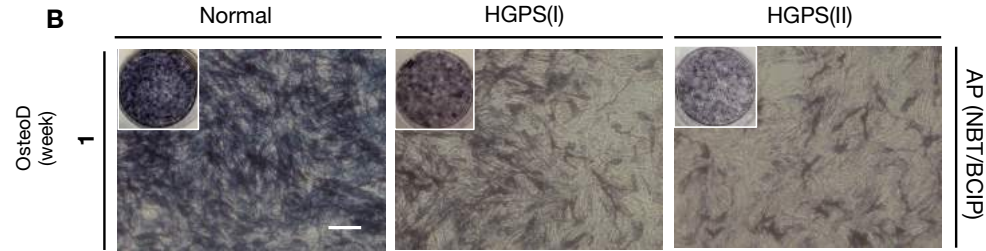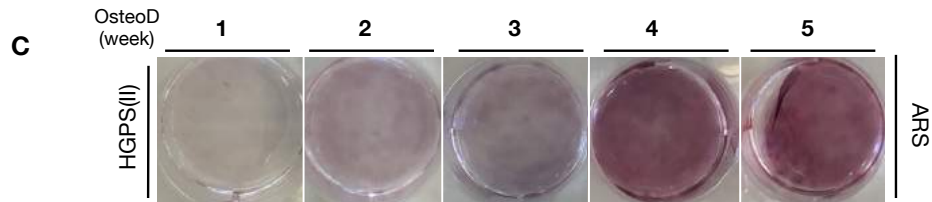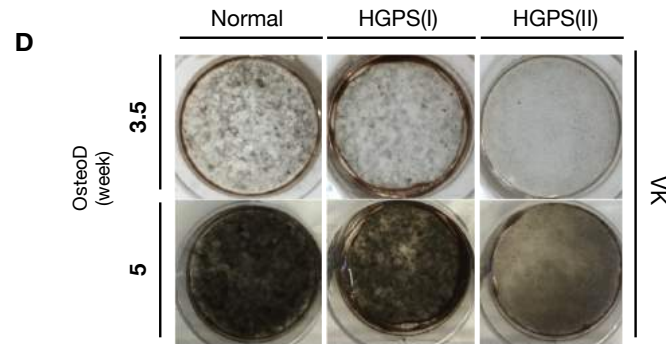

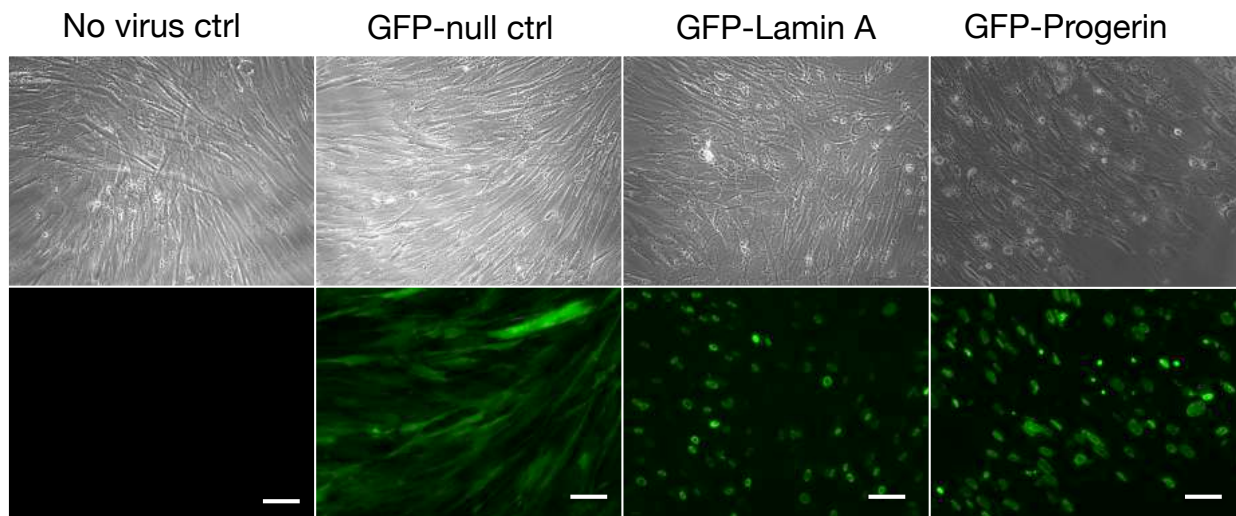

**Supp. Figure 2**

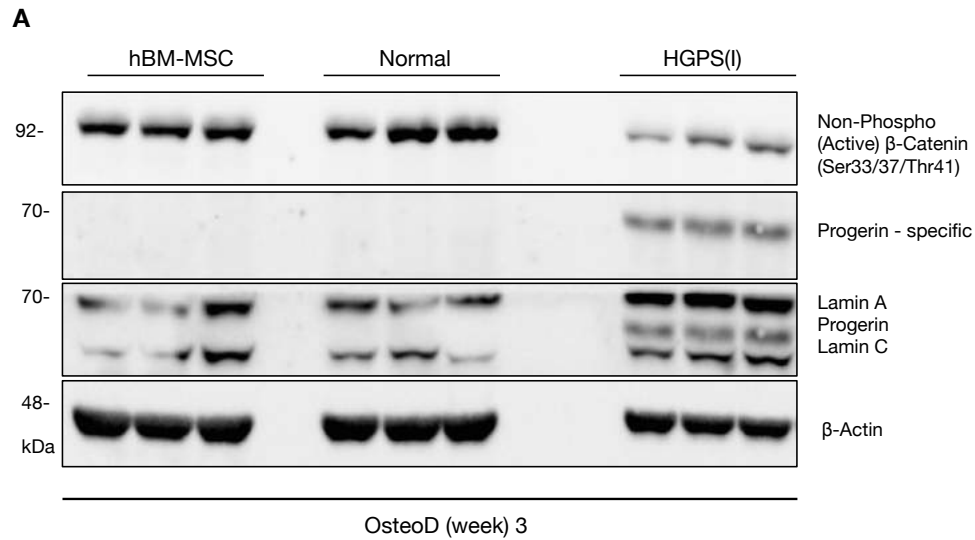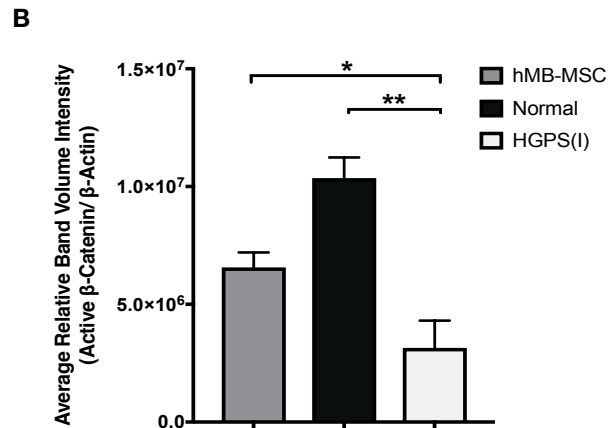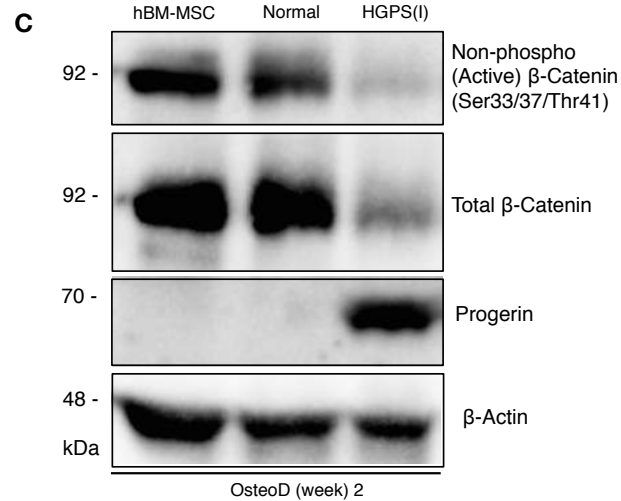

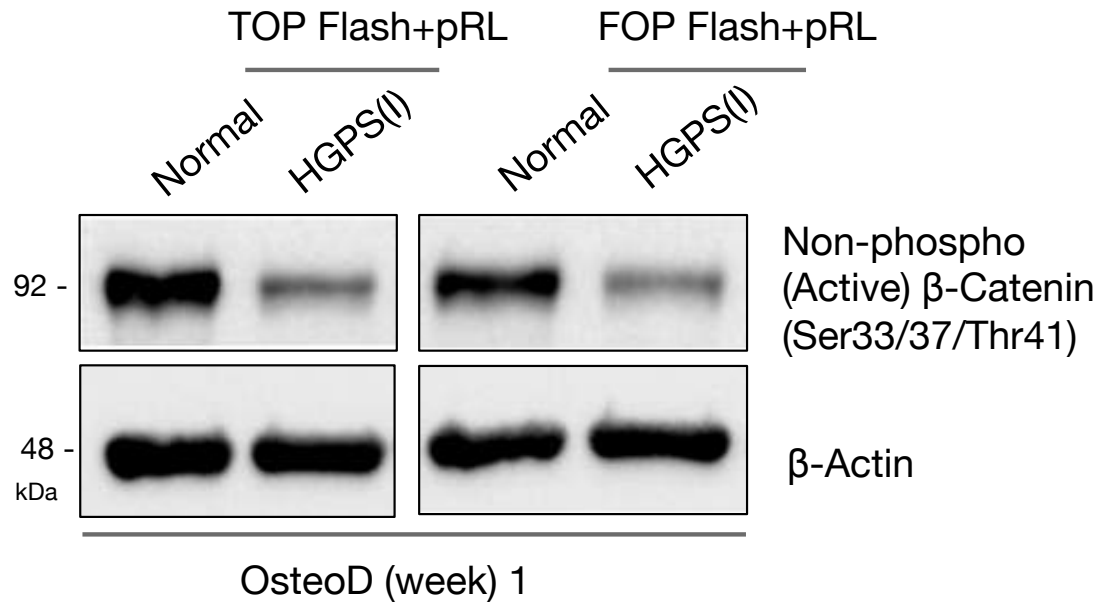

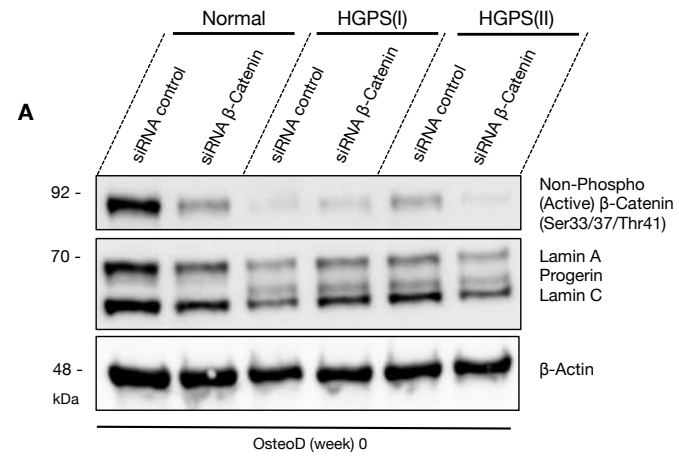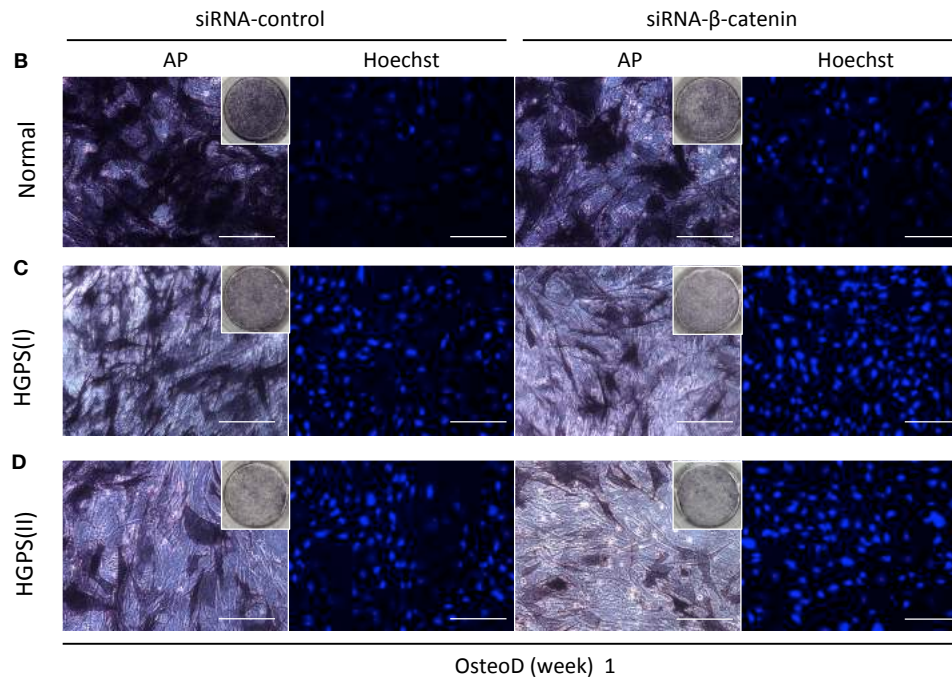

**Supp. Figure 5**

**A**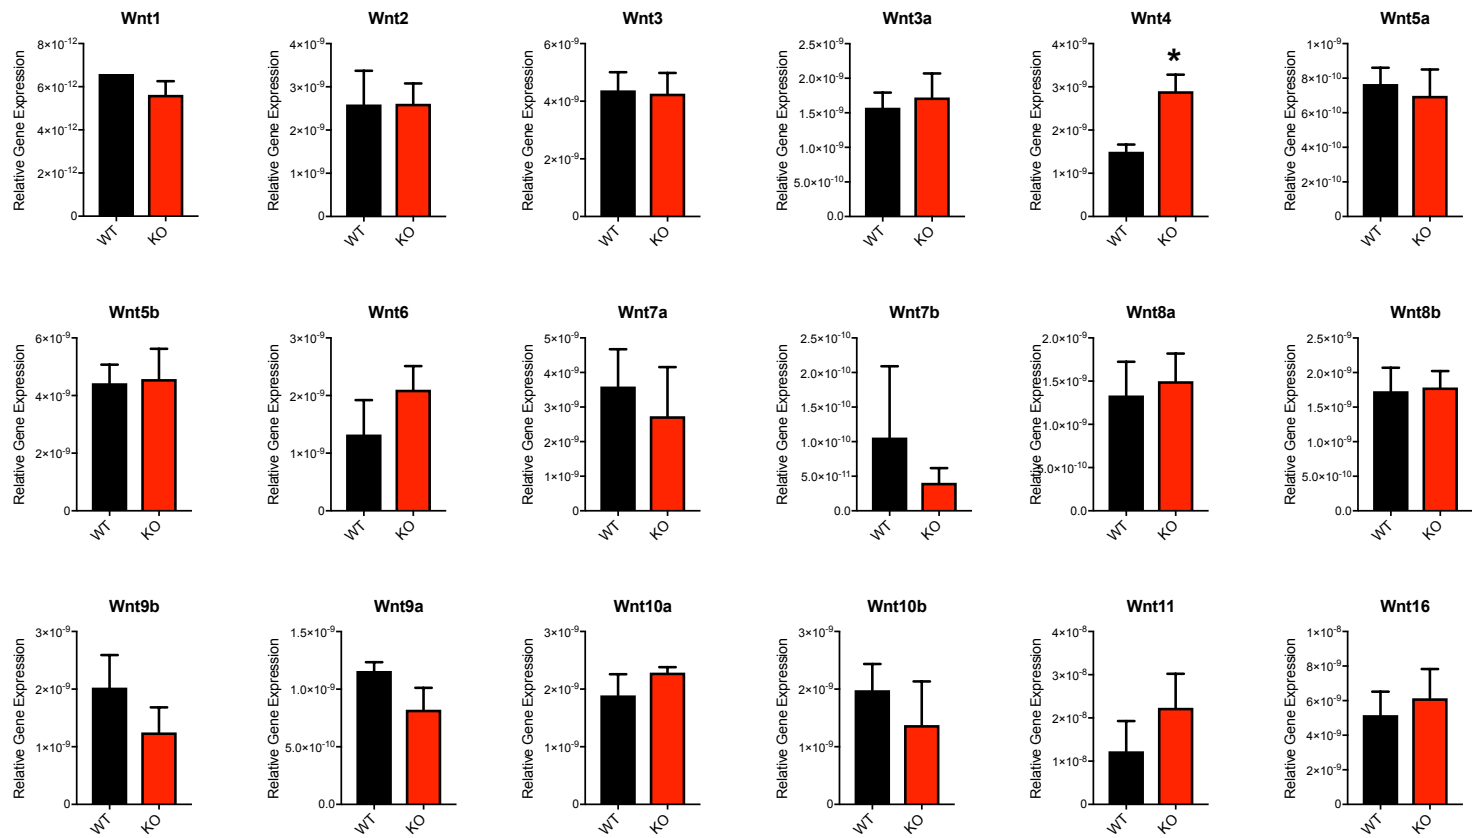**B**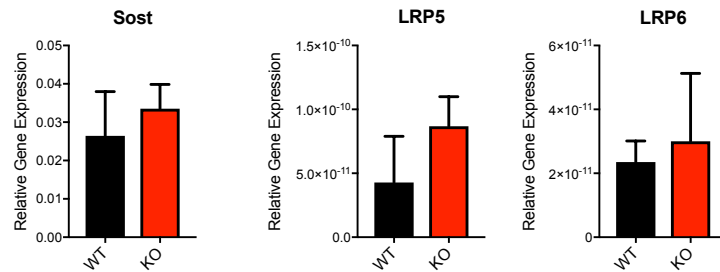

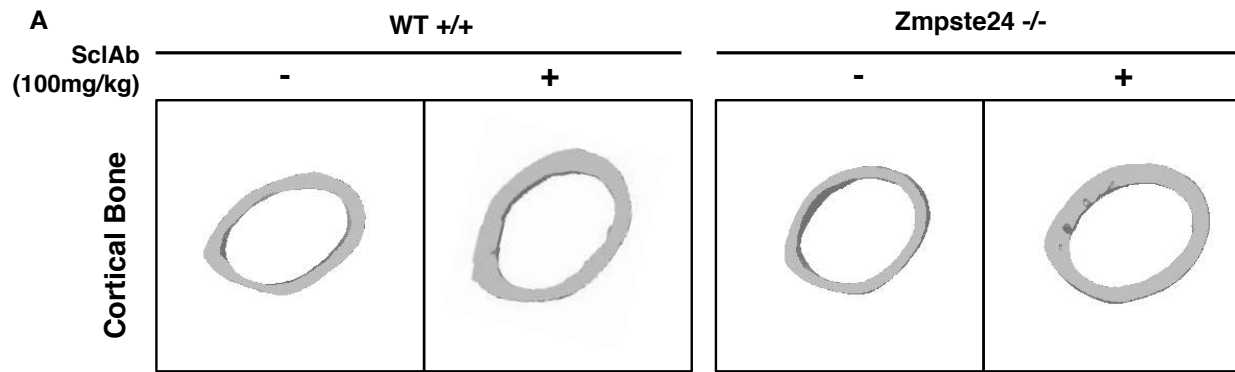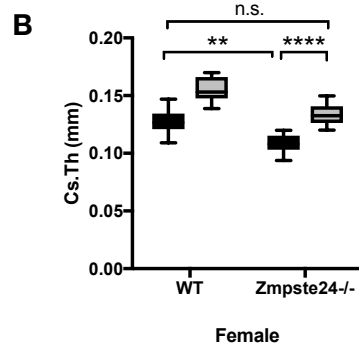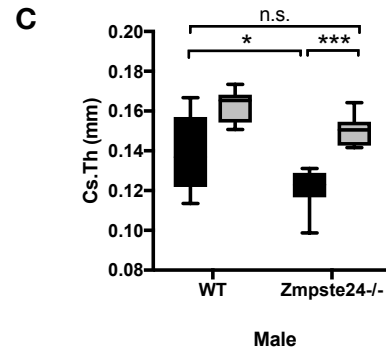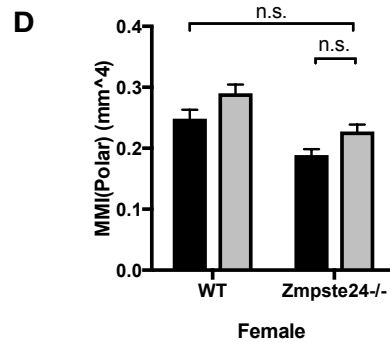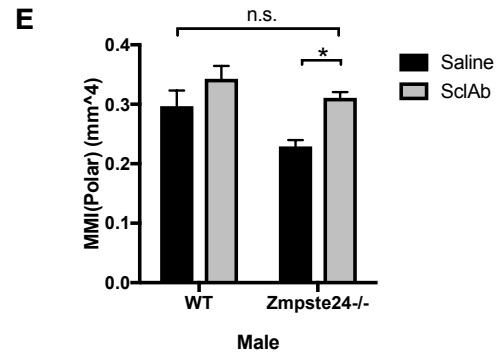

# qPCR from Tibias

Early Osteoblast Markers

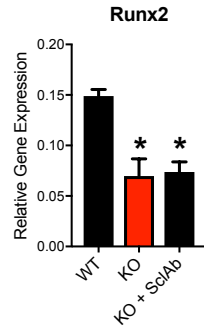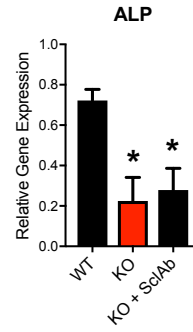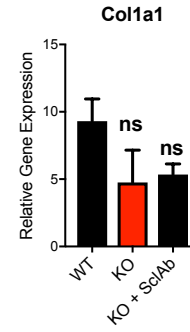

Late Osteoblast Markers

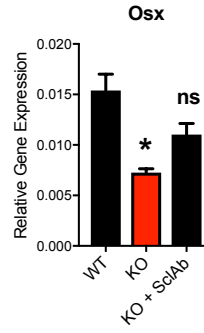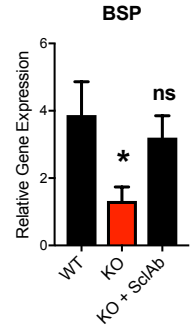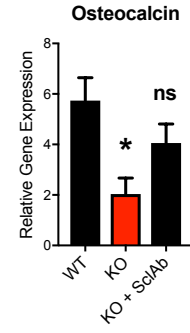

Wnt Responsive Genes

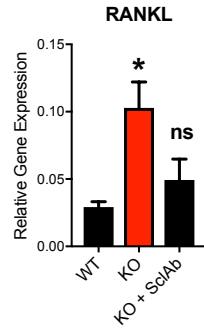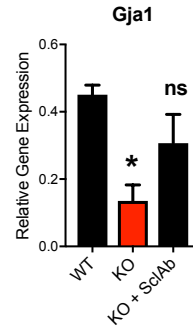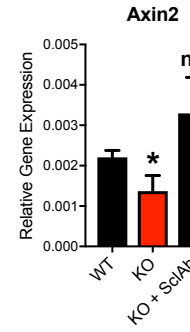

Supplement: NIHMS1651425-supplement-Suppl_Figures.pdf [file NIHMS1651425-supplement-Suppl_Figures.pdf]
